# Supplementary material for: Searches for bridged bicyclic molecules in space—norbornadiene and its cyano derivatives
Source: Royal Society of Chemistry journal article supplement (doi:10.1039/d3fd00016h), 2023-01-01
Supplement: d3fd00016h2.pdf [file d3fd00016h2.pdf]

# Searches for bridged bicyclic molecules in Space—Norbornadiene and its cyano derivatives

## Electronic Supplementary Information

Marie-Aline Martin-Drumel, Jean-Thibaut Spaniol, Helen Hölzel, Marcelino Agúndez,  
Jose Cernicharo, Kasper Moth-Poulsen, and Ugo Jacovella

### Contents

|          |                              |          |
|----------|------------------------------|----------|
| <b>1</b> | <b>Supplementary Figures</b> | <b>2</b> |
| <b>2</b> | <b>Supplementary Tables</b>  | <b>6</b> |

### List of Figures

|    |                                                                                                           |   |
|----|-----------------------------------------------------------------------------------------------------------|---|
| S1 | Synthesis of <b>CN-NBD</b> . . . . .                                                                      | 2 |
| S2 | <sup>1</sup> H NMR (400 MHz) of (±)-2-hydroxymethylbicyclo-hepta-2,5-diene in CDCl <sub>3</sub> . . . . . | 2 |
| S3 | Synthesis of <b>DCN-NBD</b> . . . . .                                                                     | 3 |
| S4 | <sup>1</sup> H NMR (400 MHz) of <b>DCN-NBD</b> in CDCl <sub>3</sub> . . . . .                             | 3 |
| S5 | <sup>13</sup> C NMR (101 MHz) of <b>DCN-NBD</b> in CDCl <sub>3</sub> . . . . .                            | 4 |
| S6 | Structural projections of <b>NBD</b> , <b>CN-NBD</b> , and <b>DCN-NBD</b> . . . . .                       | 5 |

### List of Tables

|    |                                                                                                                               |   |
|----|-------------------------------------------------------------------------------------------------------------------------------|---|
| S1 | Equilibrium structure of <b>NBD</b> ( $\omega$ B97X-D/cc-pVQZ) . . . . .                                                      | 6 |
| S2 | Equilibrium structure of <b>CN-NBD</b> ( $\omega$ B97X-D/cc-pVQZ) . . . . .                                                   | 7 |
| S3 | Equilibrium structure of <b>DCN-NBD</b> ( $\omega$ B97X-D/cc-pVQZ) . . . . .                                                  | 8 |
| S4 | Equilibrium rotational constants of <b>DCN-NBD</b> , <b>DCN-NBD</b> , and <b>DCN-NBD</b> ( $\omega$ B97X-D/cc-pVQZ) . . . . . | 8 |
| S5 | Partitions functions . . . . .                                                                                                | 9 |

# 1 Supplementary Figures

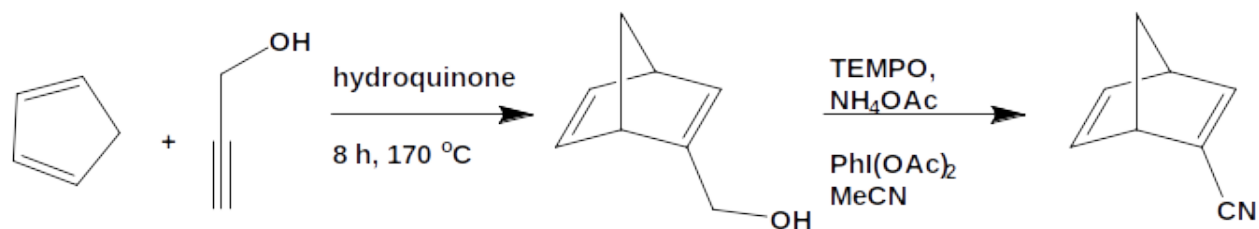

Figure S1: Synthesis of CN-NBD

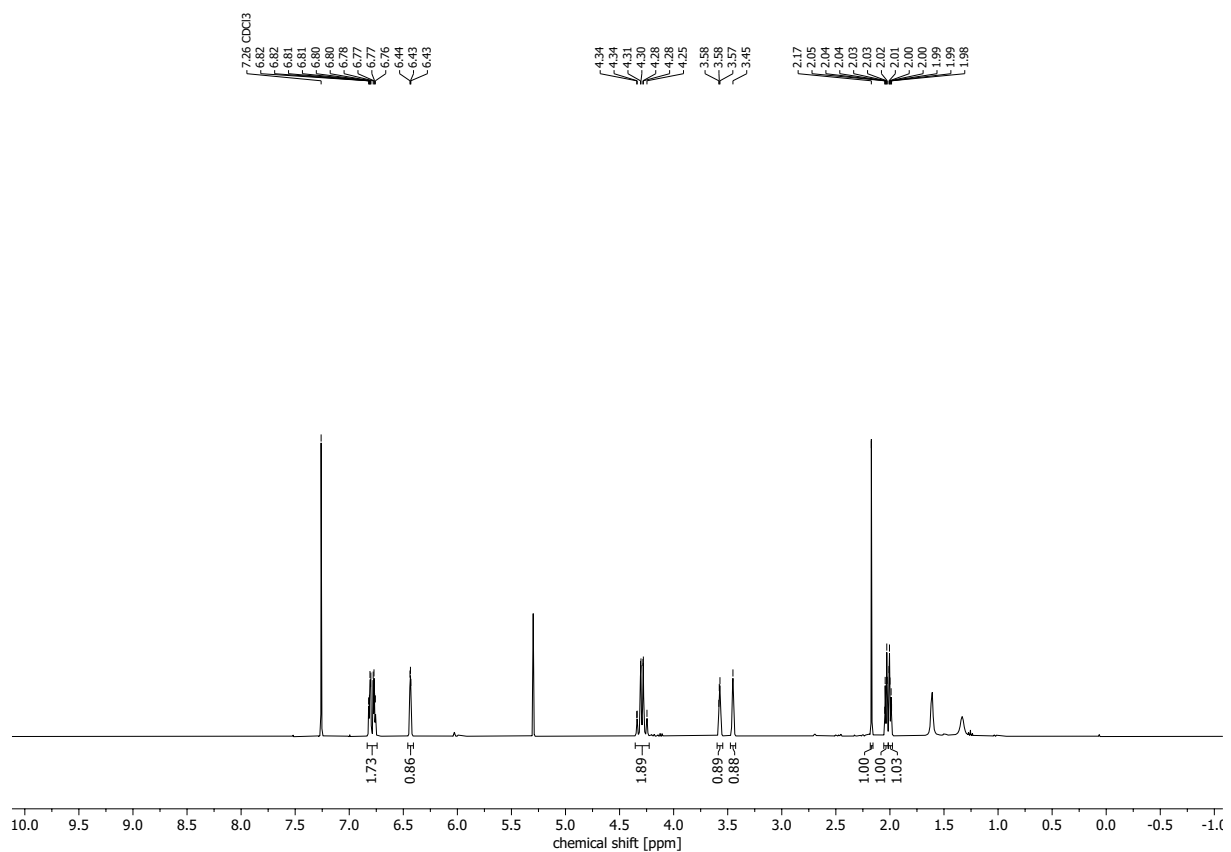

Figure S2: <sup>1</sup>H NMR (400 MHz) of (±)-2-hydroxymethylbicyclo[2.2.1]hepta-2,5-diene in CDCl<sub>3</sub> at room temperature, with dichloromethane (5.2 ppm) and water residues (1.6 ppm);  $\delta = 6.82 - 6.76$  (m, 2H), 6.44 – 6.43 (m, 1H), 4.34 – 4.25 (m, 2H), 3.58 – 3.57 (m, 1H), 3.45 (m, 1H), 2.17 (s, 1H), 2.03 (d, 1H,  $J = 4$  Hz), 2.00 (d, 1H,  $J = 4$  Hz).

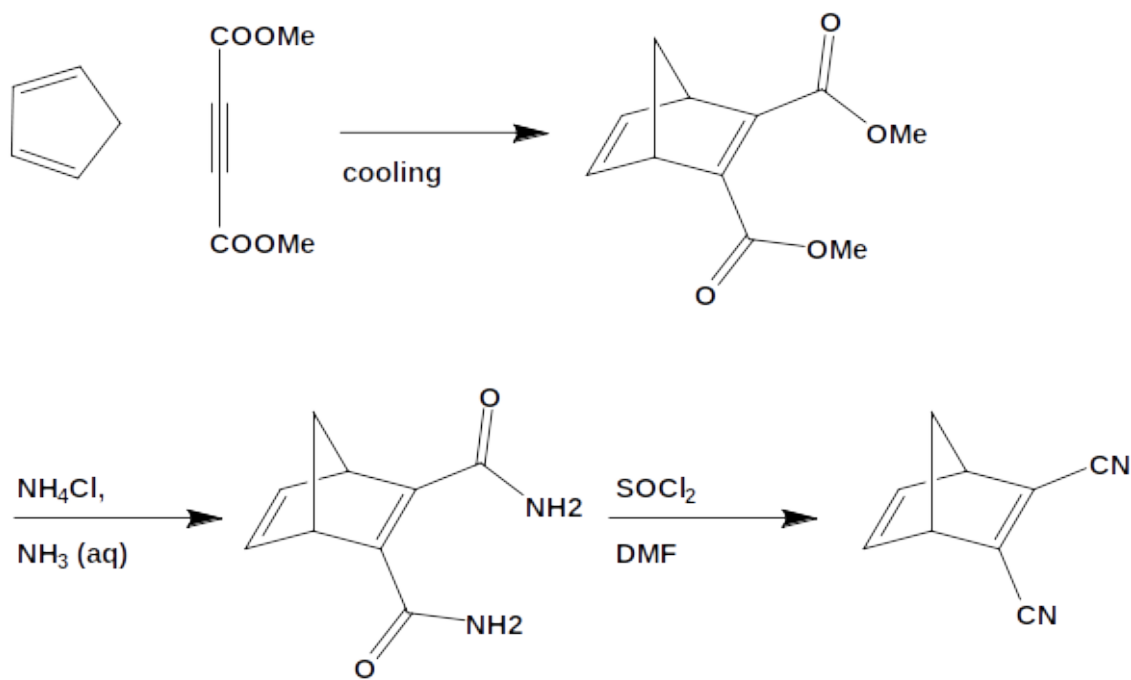

Figure S3: Synthesis of DCN-NBD

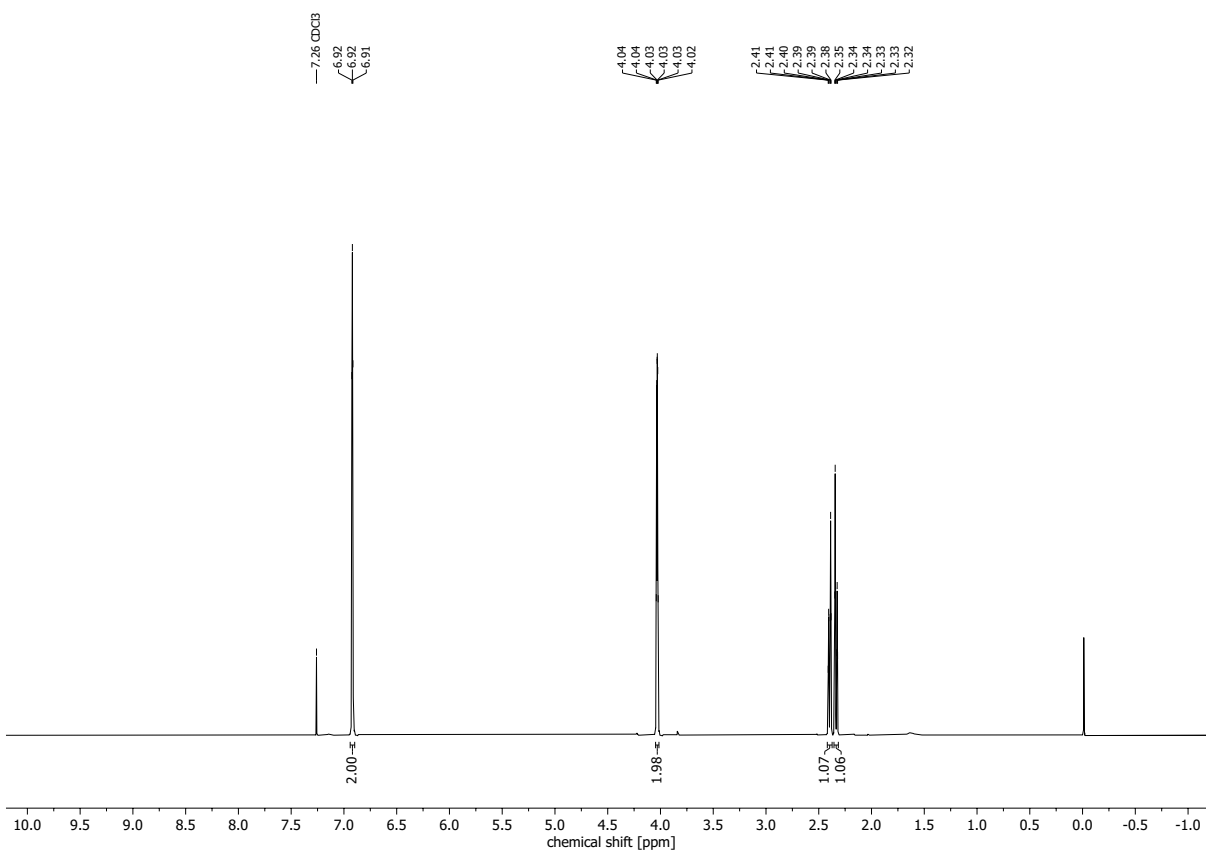

Figure S4:  $^1\text{H}$  NMR (400 MHz) of DCN-NBD in  $\text{CDCl}_3$  at room temperature;  $\delta = 6.925\text{--}6.915$  (m, 2H), 4.04 – 4.02 (m, 2H), 2.40 (dt,  $J = 7.5, 1.7$  Hz, 1H), 2.33 (dt,  $J = 7.4, 1.6$  Hz, 1H).

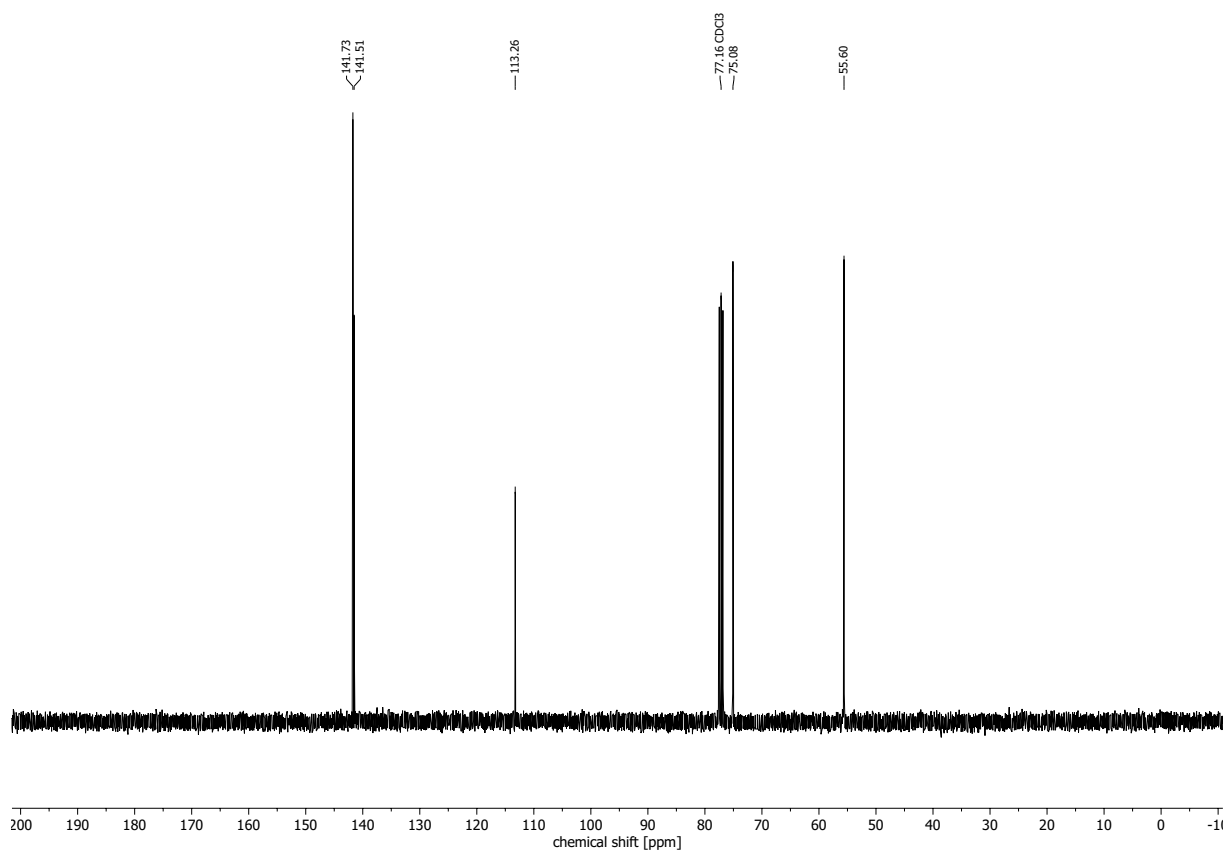

**Figure S5:** <sup>13</sup>C NMR (101 MHz) of **DCN-NBD** in CDCl<sub>3</sub> at room temperature;  $\delta = 141.7, 141.5, 113.3, 75.1, 55.6$ .

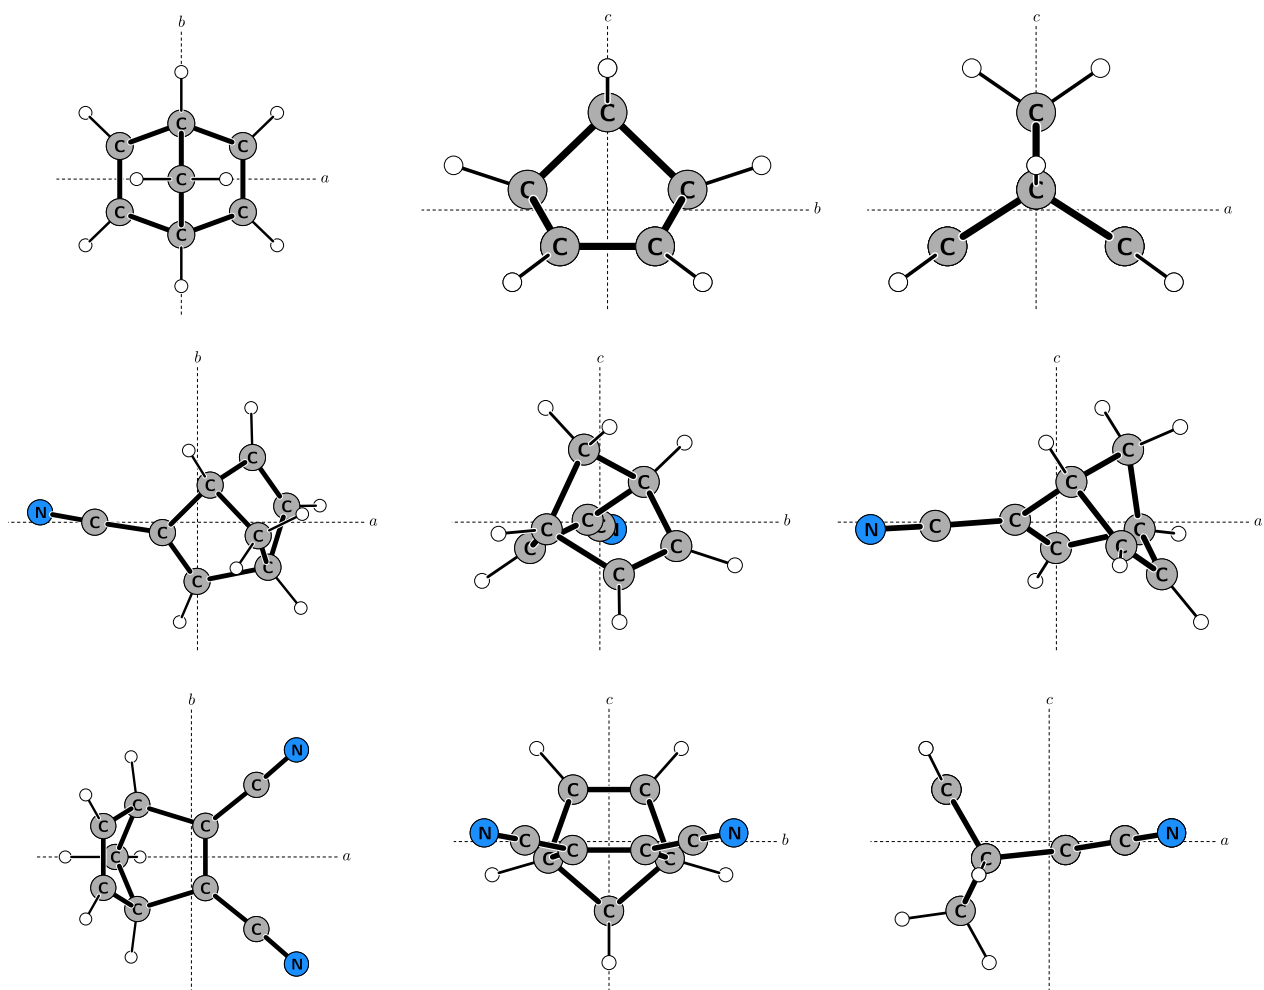

**Figure S6:** Structural projections of **NBD**, **CN-NBD**, and **DCN-NBD** (from top to bottom) along the  $ab$ ,  $bc$ , and  $ac$  planes (from left to right). Projections performed using the PMIFST software [Kisiel, 2001].

## 2 Supplementary Tables

Table S1: Equilibrium structure of **NBD** optimised at the  $\omega$ B97X-D/cc-pVQZ level of theory

Principal axis orientation:

| Center<br>Number | Atomic<br>Number | Coordinates (Angstroms) |           |           |
|------------------|------------------|-------------------------|-----------|-----------|
|                  |                  | X                       | Y         | Z         |
| 1                | 6                | 1.234587                | 0.662534  | -0.506805 |
| 2                | 6                | 0.000000                | 1.115107  | 0.284273  |
| 3                | 6                | -0.000000               | -1.115107 | 0.284273  |
| 4                | 6                | 1.234587                | -0.662534 | -0.506805 |
| 5                | 1                | 1.921016                | 1.327440  | -1.006736 |
| 6                | 1                | 1.921016                | -1.327440 | -1.006736 |
| 7                | 6                | -0.000000               | 0.000000  | 1.360071  |
| 8                | 1                | -0.896713               | 0.000000  | 1.977776  |
| 9                | 1                | 0.896713                | -0.000000 | 1.977776  |
| 10               | 6                | -1.234587               | 0.662534  | -0.506805 |
| 11               | 6                | -1.234587               | -0.662534 | -0.506805 |
| 12               | 1                | 0.000000                | 2.146246  | 0.622713  |
| 13               | 1                | -0.000000               | -2.146246 | 0.622713  |
| 14               | 1                | -1.921016               | -1.327440 | -1.006736 |
| 15               | 1                | -1.921016               | 1.327440  | -1.006736 |

**Table S2:** Equilibrium structure of **CN-NBD** optimised at the  $\omega$ B97X-D/cc-pVQZ level of theory

Principal axis orientation:

| Center<br>Number | Atomic<br>Number | Coordinates (Angstroms) |           |           |
|------------------|------------------|-------------------------|-----------|-----------|
|                  |                  | X                       | Y         | Z         |
| 1                | 6                | 1.135855                | 1.337063  | -0.419208 |
| 2                | 6                | 0.263004                | 0.767406  | 0.703669  |
| 3                | 6                | 1.455698                | -0.928441 | -0.125094 |
| 4                | 6                | 1.843471                | 0.331709  | -0.912139 |
| 5                | 1                | 1.108016                | 2.361093  | -0.754656 |
| 6                | 1                | 2.527090                | 0.343161  | -1.745666 |
| 7                | 6                | 1.254320                | -0.278097 | 1.267717  |
| 8                | 1                | 0.803211                | -0.949008 | 1.996844  |
| 9                | 1                | 2.164215                | 0.168280  | 1.662762  |
| 10               | 6                | -0.723205               | -0.213291 | 0.041377  |
| 11               | 6                | -0.007463               | -1.220436 | -0.453923 |
| 12               | 1                | -0.179385               | 1.480841  | 1.389593  |
| 13               | 1                | 2.133626                | -1.771241 | -0.202342 |
| 14               | 6                | -2.118980               | 0.001145  | -0.063983 |
| 15               | 7                | -3.248271               | 0.204618  | -0.127906 |
| 16               | 1                | -0.367473               | -2.059766 | -1.026778 |

**Table S3:** Equilibrium structure of **DCN-NBD** optimised at the  $\omega$ B97X-D/cc-pVQZ level of theory

Principal axis orientation:

| Center<br>Number | Atomic<br>Number | Coordinates (Angstroms) |           |           |
|------------------|------------------|-------------------------|-----------|-----------|
|                  |                  | X                       | Y         | Z         |
| 1                | 6                | -1.890363               | 0.662127  | 0.957296  |
| 2                | 6                | -1.160793               | 1.116595  | -0.311532 |
| 3                | 6                | -1.160793               | -1.116595 | -0.311532 |
| 4                | 6                | -1.890363               | -0.662127 | 0.957296  |
| 5                | 1                | -2.267117               | 1.331146  | 1.713516  |
| 6                | 1                | -2.267117               | -1.331146 | 1.713516  |
| 7                | 6                | -1.630029               | 0.000000  | -1.274722 |
| 8                | 1                | -1.103390               | 0.000000  | -2.227379 |
| 9                | 1                | -2.706257               | 0.000000  | -1.427021 |
| 10               | 6                | 0.300584                | 0.668929  | -0.155806 |
| 11               | 6                | 0.300584                | -0.668929 | -0.155806 |
| 12               | 1                | -1.293665               | 2.149487  | -0.610975 |
| 13               | 1                | -1.293665               | -2.149487 | -0.610975 |
| 14               | 6                | 1.394734                | 1.546991  | 0.022035  |
| 15               | 7                | 2.253691                | 2.296969  | 0.159589  |
| 16               | 6                | 1.394734                | -1.546991 | 0.022035  |
| 17               | 7                | 2.253691                | -2.296969 | 0.159589  |

**Table S4:** Equilibrium rotational constants of **DCN-NBD**, **DCN-NBD**, and **DCN-NBD** (in MHz) derived from the structure optimised at the  $\omega$ B97X-D/cc-pVQZ level of theory

| Constant | DCN-NBD   | DCN-NBD   | DCN-NBD   |
|----------|-----------|-----------|-----------|
| $A_e$    | 4337.3177 | 3881.0223 | 1540.2270 |
| $B_e$    | 3639.0411 | 1326.8412 | 1196.7806 |
| $C_e$    | 3219.7849 | 1252.3365 | 798.7702  |



**Table S5:** Partitions functions of **NBD**, **CN-NBD**, and **DCN-NBD** as a function of the temperature calculated using the SPCAT program

---

NBD

---

| TEMPERATURE | Q(SPIN-ROT.) | log Q(SPIN-ROT.) |
|-------------|--------------|------------------|
| 300.000     | 2000043.0864 | 6.3010           |
| 225.000     | 1299167.5476 | 6.1137           |
| 150.000     | 707147.2317  | 5.8495           |
| 75.000      | 250047.4339  | 5.3980           |
| 37.500      | 88449.2918   | 4.9467           |
| 18.750      | 31306.4805   | 4.4956           |
| 9.375       | 11093.9073   | 4.0451           |

---



---

CN-NBD

---

| TEMPERATURE | Q(SPIN-ROT.) | log Q(SPIN-ROT.) |
|-------------|--------------|------------------|
| 300.000     | 350337.5958  | 5.5445           |
| 225.000     | 227576.9790  | 5.3571           |
| 150.000     | 123851.3301  | 5.0929           |
| 75.000      | 43780.4448   | 4.6413           |
| 37.500      | 15480.2707   | 4.1898           |
| 18.750      | 5475.4236    | 3.7384           |
| 10.000      | 2134.4195    | 3.3293           |
| 9.375       | 1937.7144    | 3.2873           |

---



---

DCN-NBD

---

| TEMPERATURE | Q(SPIN-ROT.) | log Q(SPIN-ROT.) |
|-------------|--------------|------------------|
| 300.000     | 713498.2663  | 5.8534           |
| 225.000     | 470975.6689  | 5.6730           |
| 150.000     | 258541.8459  | 5.4125           |
| 75.000      | 91530.2785   | 4.9616           |
| 37.500      | 32358.6627   | 4.5100           |
| 18.750      | 11442.9034   | 4.0585           |
| 10.000      | 4459.2338    | 3.6493           |
| 9.375       | 4048.0995    | 3.6073           |

---

## References

- Z. Kisiel. Assignment and Analysis of Complex Rotational Spectra. In J. Demaison, K. Sarka, and E. A. Cohen, editors, *Spectroscopy from Space*, pages 91–106. Springer Netherlands, Dordrecht, 2001. ISBN 978-0-7923-6993-6 978-94-010-0832-7. doi:[10.1007/978-94-010-0832-7\\_6](https://doi.org/10.1007/978-94-010-0832-7_6).
